# Supplementary material for: Integrating Pharmacoproteomics into Early-Phase Clinical Development: State-of-the-Art, Challenges, and Recommendations
Source: MDPI journal article supplement (doi:10.3390/ijms18020448), 2017-02-19
Supplement: s1 [file s1]

# Supplementary Materials: Integrating Pharmacoproteomics into Early-Phase Clinical Development: State-of-the-Art, Challenges, and Recommendations

Savita Nandal and Tal Burt

**Table S1.** Result of Clinical trials.gov.database search.

| Number | NCT No.     | Phase | Objective of Proteomic Biomarkers | Sponsor       | Year | Therapeutic Area | Title                                                                                                                                                          |
|--------|-------------|-------|-----------------------------------|---------------|------|------------------|----------------------------------------------------------------------------------------------------------------------------------------------------------------|
| 1      | NCT02008994 | 2     | Prognosis                         | Academia      | 2013 | Oncology         | Phase II study using genomic & proteomic profiling to influence treatments for patients with metastatic breast cancer                                          |
| 2      | NCT00669773 | 2     | Efficacy                          | Industry      | 2007 | Skeletal system  | This study will evaluate the ability of comparative proteomics to identify early biomarkers of muscle anabolism                                                |
| 3      | NCT00669773 | 2     | Prognosis biomarker validation    | Academia      | 2008 | Oncology         | Validate gene expression and proteomic signatures predictive of treatment for response for breast cancer patient                                               |
| 4      | NCT02783924 | 2     | Pathophysiology                   | Academia      | 2014 | Endocrinology    | The GLOBAL vitamin d study. a genomic, transcriptomic, proteomic and metabolomic approach                                                                      |
| 5      | NCT01728181 | 1/2   | Efficacy safety                   | Academia      | 2013 | Oncology         | A Phase I/II study of tivozanib and erlotinib as initial treatment for metastatic non-small cell lung cancer assigned by VeriStrat® serum proteomic evaluation |
| 6      | NCT01383590 | 1     | Biomarker development             | Industry      | 2011 | Immunology       | Identification of potential biomarkers of peptide immunotherapy. part 1—proteomics analysis                                                                    |
| 7      | NCT02470819 | 2     | Efficacy                          | Academia      | 2014 | Oncology         | Genomic and proteomic profiling targets influenced treatment in metastatic breast cancer                                                                       |
| 8      | NCT00550537 | 2     | Prognosis                         | Academia      | 2007 | Oncology         | Proteomic profiling in predicting response in patients receiving erlotinib for stage IIIB, stage IV, or recurrent non-small cell lung cancer                   |
| 9      | NCT00198237 | 2     | Efficacy                          | Collaboration | 2003 | Oncology         | Genomic and proteomic analysis of docetaxel & capecitabine as primary chemo for stage ii-iii breast cancer                                                     |
| 10     | NCT01484080 | 1/2   | Efficacy                          | Academia      | 2011 | Oncology         | Neoadjuvant paclitaxel versus BIBF 1120 priming followed by BIBF 1120 plus paclitaxel in early HER-2                                                           |

|    |             |     |                                                    |               |      |                       |                                                                                                                                                                                |
|----|-------------|-----|----------------------------------------------------|---------------|------|-----------------------|--------------------------------------------------------------------------------------------------------------------------------------------------------------------------------|
|    |             |     |                                                    |               |      |                       | Negative breast cancer with proteomic and dynamic imaging correlates                                                                                                           |
| 11 | NCT01962454 | 1   | Efficacy                                           | Industry      | 2013 | Endocrinology         | A study to evaluate a skeletal-muscle microbiopsy technique with dynamic proteomic measurement in healthy male volunteers                                                      |
| 12 | NCT00212069 | 2   | Exploratory                                        | Academia      | 2004 | Oncology              | Serum proteomics to predict gemcitabine sensitivity in breast cancer                                                                                                           |
| 13 | NCT01097902 | 1   | Predicts response or efficacy                      | Academia      | 2010 | Pain                  | Study of experimental models of pain and inflammation                                                                                                                          |
| 14 | NCT02040441 | 2/3 | Diagnostic, mechanism, efficacy and quantification | Academia      | 2013 | endocrinology         | Proteomic prediction and renin angiotensin aldosterone system inhibition prevention of early diabetic nephropathy in TYpe 2 diabetic patients with normoalbuminuria (PRIORITY) |
| 15 | NCT00212095 | 2   | Safety                                             | Academia      | 2005 | Oncology              | Docetaxel combined with ketoconazole in treatment of breast cancer                                                                                                             |
| 16 | NCT00714246 | 1/2 | Efficacy or treatment response                     | Collaboration | 2008 | Oncology              | Bortezomib (PS-341) in combination with carboplatin and docetaxel for patients with advanced non-small cell lung cancer                                                        |
| 17 | NCT00953472 | 1   | Efficacy                                           | Academia      | 2009 | Cardiovascular system | B-type natriuretic peptide (bnp) in human hypertension                                                                                                                         |
| 18 | NCT00114738 | 2   | Efficacy                                           | Academia      | 2005 | Oncology              | EPOCH-R chemotherapy plus bortezomib to treat mantle cell lymphoma                                                                                                             |
| 19 | NCT00817531 | 2   | Efficacy                                           | Academia      | 2008 | Oncology              | Efficacy study of dasatinib in locally advanced triple-negative breast cancer patients                                                                                         |
| 20 | NCT00039585 | 2   | Efficacy and toxicity                              | Academia      | 2002 | Oncology              | Imatinib mesylate in treating patients with refractory or relapsed ovarian epithelial, fallopian tube, or primary peritoneal cancer, or ovarian low malignant potential tumor  |
| 21 | NCT00884767 | 2   | Safety                                             | Academia      | 2007 | Oncology              | Biomarkers in predicting neurotoxicity in patients with colorectal cancer receiving Oxaliplatin                                                                                |
| 22 | NCT00867334 | 1/2 | Safety and efficacy                                | Collaboration | 2009 | Oncology              | New individualized therapy trial for metastatic colorectal cancer (NITMEC)                                                                                                     |
| 23 | NCT02836847 | 2   | Predictive                                         | Academia      | 2016 | Oncology              | Molecularly target therapy with gemox in advanced or recurrent extrahepatic cholangiocarcinoma and gallbladder carcinoma                                                       |
| 24 | NCT00095459 | 1   | Efficacy                                           | Academia      | 2004 | Oncology              | BAY 43-9006 (sorafenib) and bevacizumab (avastin) to treat solid tumors                                                                                                        |

|    |             |   |                              |               |      |                               |                                                                                                                                                                                          |
|----|-------------|---|------------------------------|---------------|------|-------------------------------|------------------------------------------------------------------------------------------------------------------------------------------------------------------------------------------|
| 25 | NCT00212082 | 2 | Efficacy and safety          | Academia      | 2002 | Oncology                      | Gene expression profiles in predicting chemotherapy response in breast cancer                                                                                                            |
| 26 | NCT00049556 | 2 | Efficacy and safety          | Academia      | 2002 | Oncology                      | Gefitinib in treating patients with cervical cancer                                                                                                                                      |
| 27 | NCT01548924 | 1 | Efficacy and safety          | Academia      | 2012 | Oncology                      | Determination of dose of antiangiogenic multitargeted DOVITINIB (TKI258) plus paclitaxel in patients with solid tumors                                                                   |
| 28 | NCT00445549 | 2 | Efficacy                     | Academia      | 2007 | Oncology                      | Vandetanib to treat women with ovarian, fallopian tube, or primary peritoneal cancer                                                                                                     |
| 29 | NCT00950820 | 2 | Efficacy and safety          | Academia      | 2009 | Oncology                      | Study to evaluate the effects of panitumumab if combined with chemotherapy for 2nd treatment of colorectal cancer (VOXEL)                                                                |
| 30 | NCT01012609 | 2 | Efficacy                     | Academia      | 2009 | Oncology                      | External beam radiation therapy and cetuximab followed by irinotecan and cetuximab for children and young adults with newly diagnosed diffuse pontine tumors and high-grade astrocytomas |
| 31 | NCT02891980 | 1 | Efficacy                     | Academia      | 2016 | Immunology/healthy volunteers | MVA-BN®-Filo and Ad26.ZEBOV vaccines in healthy volunteers                                                                                                                               |
| 32 | NCT00619541 | 2 | Efficacy and safety          | Academia      | 2007 | Oncology                      | Study of sorafenib and infusional 5-fluorouracil in advanced hepatocellular carcinoma (HCC)                                                                                              |
| 33 | NCT00619996 | 2 | Efficacy and safety          | Academia      | 2007 | Oncology                      | Study of sorafenib and docetaxel in metastatic prostate cancer                                                                                                                           |
| 34 | NCT00251225 | 2 | Efficacy                     | Collaboration | 2005 | Oncology                      | A study of imatinib and docetaxel in prostate cancer                                                                                                                                     |
| 35 | NCT00937417 | 1 | Efficacy                     | Academia      | 2008 | Oncology                      | S0716 vandetanib and docetaxel in treating patients with advanced solid tumors                                                                                                           |
| 36 | NCT00354978 | 2 | Efficacy                     | Collaboration | 2004 | Oncology                      | Study of FOLFIRI Plus bevacizumab in colorectal cancer patients                                                                                                                          |
| 37 | NCT00807950 | 2 | Refine selection of patients | Academia      | 2008 | Oncology                      | Phase II study of simvastatin in primary breast cancer; test of its potential selectivity on basal subtype breast cancer                                                                 |
| 38 | NCT00866762 | 2 | Mechanistic                  | Academia      | 2009 | Oncology                      | A study of the efficacy of MK-0683 in patients with polycythaemia vera and essential thrombocythaemia                                                                                    |
| 39 | NCT02557529 | 2 | Exploratory                  | Academia      | 2015 | Oncology                      | Progressive resistance training in head and neck cancer patients during concomitant chemoradiotherapy                                                                                    |
| 40 | NCT00877500 | 2 | Efficacy                     | Collaboration | 2009 | Oncology                      | Randomized study of ixabepilone versus observation in patients with significant residual disease                                                                                         |
| 41 | NCT00111397 | 1 | Exploratory                  | Academia      | 2005 | Infection                     | Adjuvant cytokine therapy to treat pulmonary mycobacterium avium complex infection                                                                                                       |

|    |             |       |                     |               |      |                 |                                                                                                                                                        |
|----|-------------|-------|---------------------|---------------|------|-----------------|--------------------------------------------------------------------------------------------------------------------------------------------------------|
| 42 | NCT02406794 | 1/2   | Safety and efficacy | Academia      | 2016 | Oncology        | Effect of kinesiotaping for the treatment of hormone-induced myalgia in women given breast cancer survivors (KITMYCAN)                                 |
| 43 | NCT02582827 | 1     | Exploratory         | Industry      |      | Oncology        | QUILT-3.014: a trial of ABI-011 administered weekly in patients with advanced solid tumors or lymphomas                                                |
| 44 | NCT01290172 | 1     | Exploratory         | Academia      | 2010 | Transplantation | Evaluation of efficacy and safety of somatostatin used as inflow modulator in liver transplantation                                                    |
| 45 | NCT01215578 | 2     | Predictive          | Academia      | 2008 | Oncology        | Predictive biomarkers of response to sunitinib in the treatment of poorly-differentiated neuro-endocrine tumors (NET)                                  |
| 46 | NCT00811031 | 2     | Efficacy            | Industry      | 2008 | Oncology        | Preoperative docetaxel for localized progressive castration-resistant prostate cancer (CRPC)                                                           |
| 47 | NCT02921997 | 2     | Efficacy            | Academia      | 2016 | Immunology      | Immunogenicity of monovalent inactivated influenza A/H7N9 virus vaccine                                                                                |
| 48 | NCT00672009 | 2     | Efficacy            | Collaboration | 2008 | Oncology        | A study of ixabepilone before surgery for high-risk localized prostate cancer                                                                          |
| 49 | NCT00255463 | 2     | Exploratory         | Industry      | 2004 | Oncology        | Phase II neoadjuvant ER+/PgR + Arimidex ± Iressa study                                                                                                 |
| 50 | NCT00382694 | 2     | Prognostic          | Academia      | 2005 | Oncology        | Fludarabine added to induction treatment in untreated multiple myeloma patients                                                                        |
| 51 | NCT00121953 | 2 / 3 | Exploratory         | Academia      | 2005 | Gynaecology     | Effect of rosiglitazone on peritoneal cytokines in women with endometriosis                                                                            |
| 52 | NCT01233492 | 1     | Exploratory         | Academia      | 2007 | Oncology        | Boron phenylalanine with or without mannitol in treating patients with glioblastoma multiforme                                                         |
| 53 | NCT00466505 | 2     | Safety/efficacy     | Academia      | 2005 | Oncology        | Cetuximab and celecoxib for metastatic colorectal cancer or colorectal cancer that cannot be removed by surgery                                        |
| 54 | NCT01047293 | 1/2   | Efficacy and safety | Collaboration | 2010 | Oncology        | RAD001, FOLFOX and bevacizumab in treatment of colorectal carcinoma                                                                                    |
| 55 | NCT01023477 | 1/2   | Efficacy            | Academia      | 2009 | Oncology        | Study of the efficacy of chloroquine in the treatment of ductal carcinoma in Situ (The PINC Trial)                                                     |
| 56 | NCT02520115 | 1     | Diagnostic          | Academia      | 2015 | Oncology        | Folate receptor in diagnosing ovarian cancer using serum samples from patients with newly diagnosed pelvic mass or previously diagnosed ovarian cancer |
| 57 | NCT00115661 | 1     | Exploratory         | Academia      | 2005 | Gynaecology     | Use of rosiglitazone in the treatment of endometriosis                                                                                                 |
| 58 | NCT00090545 | 2     | Biological effect   | Academia      | 2004 | Oncology        | Phase II study of BAY 43-9006 (Sorafenib) in metastatic, androgen-independent prostate cancer                                                          |
| 59 | NCT00416130 | 1/2   | Predictive marker   | Collaboration | 2007 | Oncology        | Phase I/II clinical trial of vorinostat in patients with recurrent and/or metastatic breast cancer                                                     |

|    |             |     |             |               |      |                      |                                                                                                                                                                                                                              |
|----|-------------|-----|-------------|---------------|------|----------------------|------------------------------------------------------------------------------------------------------------------------------------------------------------------------------------------------------------------------------|
| 60 | NCT00674557 | 2   | Exploratory | Academia      | 2008 | Oncology             | Exemestane with or without atn-224 in treating postmenopausal women with recurrent or advanced breast cancer                                                                                                                 |
| 61 | NCT00601289 | 2   | Exploratory | Academia      | 2009 | Oncology             | Temozolomide in treating patients with invasive pituitary tumors                                                                                                                                                             |
| 62 | NCT00972933 | 2   | Efficacy    | Collaboration | 2009 | Oncology             | Immunogenicity and biomarker analysis of neoadjuvant ipilimumab for melanoma                                                                                                                                                 |
| 63 | NCT01282502 | 1   | Efficacy    | Academia      | 2011 | Oncology             | Midostaurin (PKC412) for locally advanced rectal cancer                                                                                                                                                                      |
| 64 | NCT02434627 | 1   | Exploratory | Academia      | 2015 | Skeletal system      | Sodium nitrate for muscular dystrophy                                                                                                                                                                                        |
| 65 | NCT00324597 | 1   | Exploratory | Academia      | 2005 | Oncology             | AMG 706 and gemcitabine in treating patients with advanced solid tumors or lymphoma                                                                                                                                          |
| 66 | NCT00445341 | 1/2 | Exploratory | Academia      | 2007 | Oncology             | Flavopiridol to treat relapsed mantle cell lymphoma or diffuse large b-cell lymphoma                                                                                                                                         |
| 67 | NCT00329914 | 2   | Efficacy    | Academia      | 2006 | Gynaecology          | Does progesterone prevent very preterm delivery in twin pregnancies                                                                                                                                                          |
| 68 | NCT01129453 | 1   | Exploratory | Academia      | 2010 | Infection            | Safety and immunogenicity of CVD 1902 Oral attenuated vaccine to prevent <i>S. paratyphi</i> A infection                                                                                                                     |
| 69 | NCT02514941 | 1   | Exploratory | Academia      | 2007 | Obesity              | Bioavailability of paracetamol, amoxicillin and talinolol before, immediately and one year after gastric bypass operation                                                                                                    |
| 70 | NCT00645710 | 1/2 | Exploratory | Academia      | 2005 | Oncology             | Hepatic arterial infusion of floxuridine, gemcitabine hydrochloride, and radiolabeled monoclonal antibody therapy in treating liver metastases in patients with metastatic colorectal cancer previously treated with surgery |
| 71 | NCT00770471 | 1/2 | Exploratory | Academia      | 2009 | Oncology             | ABT-888, radiation therapy, and temozolomide in treating patients with newly diagnosed glioblastoma multiforme                                                                                                               |
| 72 | NCT00098072 | 1   | Exploratory | Academia      | 2004 | Lung and respiratory | Endothelial cell dysfunction in pulmonary hypertension                                                                                                                                                                       |
| 73 | NCT00536874 | 2   | Efficacy    | Academia      | 2007 | Oncology             | Gemcitabine and oxaliplatin in treating patients with pancreatic cancer that can be removed by surgery                                                                                                                       |
| 74 | NCT00354679 | 2   | Efficacy    | Academia      | 2006 | Oncology             | Irinotecan, cisplatin, bevacizumab, radiation therapy, and surgery in treating patients with locally advanced esophageal cancer                                                                                              |
| 75 | NCT01338753 | 2   | Efficacy    | Collaboration | 2009 | Oncology             | Study to evaluate markers of response in locally advanced breast cancer (IMAGING)                                                                                                                                            |

|    |             |     |             |               |      |                 |                                                                                                                                                                       |
|----|-------------|-----|-------------|---------------|------|-----------------|-----------------------------------------------------------------------------------------------------------------------------------------------------------------------|
| 76 | NCT00433485 | 1   | Exploratory | Academia      | 2008 | Oncology        | Topical sirolimus in patients with basal cell nevus syndrome and in healthy participants                                                                              |
| 77 | NCT00851552 | 2   | Exploratory | Academia      | 2009 | Oncology        | Bortezomib, doxorubicin hydrochloride liposome, and rituximab in treating patients with diffuse large b-cell lymphoma that has relapsed or not responded to treatment |
| 78 | NCT00602082 | 2   | Exploratory | Academia      | 2005 | Oncology        | Capecitabine and streptozocin with or without cisplatin in treating patients with unresectable or metastatic neuroendocrine tumors                                    |
| 79 | NCT00389922 | 1   | Safety      | Academia      | 2005 | Oncology        | Lapatinib and vinorelbine in treating patients with advanced solid tumors                                                                                             |
| 80 | NCT00391170 | 2   | Exploratory | Academia      | 2006 | Transplantation | Dexamethasone to prevent oral chronic graft-versus-host disease                                                                                                       |
| 81 | NCT01263145 | 1   | Exploratory | Academia      | 2011 | Oncology        | MK2206 and paclitaxel in treating patients with locally advanced or metastatic solid tumors or metastatic breast cancer                                               |
| 82 | NCT00546897 | 2   | Efficacy    | Academia      | 2007 | Oncology        | Lenalidomide in older patients with acute myeloid leukemia without chromosome 5q abnormalities                                                                        |
| 83 | NCT00108836 | 2   | Exploratory | Industry      | 2005 | CNS             | Efficacy, safety and tolerability of XBD173 in patients with generalized anxiety disorder                                                                             |
| 84 | NCT00971230 | 1/2 | Exploratory | Academia      | 2009 | Infection       | A pilot study of pre-exposure prophylaxis (PrEP) to evaluate safety, acceptability, and adherence in at-risk populations in Kenya, Africa                             |
| 85 | NCT01504542 | 2   | Exploratory | Industry      | 2011 | Oncology        | Immune response and safety of hs110 vaccine in combination with erlotinib in patients with non-small cell lung cancer                                                 |
| 86 | NCT00674414 | 2   | Efficacy    | Industry      |      | Oncology        | Trastuzumab with or without everolimus in treating women with breast cancer that can be removed by surgery                                                            |
| 87 | NCT00722969 | 2   | Efficacy    | Academia      | 2007 | Oncology        | Erlotinib and sorafenib in chemo-naïve patients with locally advanced or metastatic non small cell lung cancer                                                        |
| 88 | NCT00548899 | 2   | Efficacy    | Collaboration | 2007 | Oncology        | Neoadjuvant chemotherapy including sorafenib in women with previously untreated primary breast cancer (SOFIA)                                                         |
| 89 | NCT00375310 | 1   | Efficacy    | Collaboration | 2006 | Oncology        | Phase I study of gemcitabine, sorafenib and Radiotherapy in patients with unresectable pancreatic cancer                                                              |

|     |             |     |             |               |      |                        |                                                                                                                                                                    |
|-----|-------------|-----|-------------|---------------|------|------------------------|--------------------------------------------------------------------------------------------------------------------------------------------------------------------|
| 90  | NCT02502006 | 1   | Efficacy    | Academia      | 2015 | Pain                   | Variability in response to non-steroidal anti-inflammatory drugs                                                                                                   |
| 91  | NCT01425580 | 2   | Efficacy    | Academia      | 2012 | endocrinology          | Liraglutide and heart failure in type 2 diabetes                                                                                                                   |
| 92  | NCT01110785 | 2   | Efficacy    | Academia      | 2010 | Oncology               | Simvastatin and panitumumab in treating patients with advanced or metastatic colorectal cancer                                                                     |
| 93  | NCT00967031 | 2   | Efficacy    | Academia      | 2009 | Oncology               | Lapatinib ditosylate and capecitabine in treating patients with stage iv breast cancer and brain metastases                                                        |
| 94  | NCT00331058 | 1   | Efficacy    | Industry      | 2006 | Lung and respiratory   | Comparison of molecular targets in mild to severe asthmatics and healthy subjects                                                                                  |
| 95  | NCT01328171 | 2   | Efficacy    | Collaboration | 2011 | Oncology               | FOLFIRI with or without panitumumab in metastatic colorectal cancer (VOLFI) (VOLFI)                                                                                |
| 96  | NCT01251536 | 2   | Efficacy    | Collaboration | 2010 | Oncology               | Cetuximab standard or dose escalation in first line colorectal cancer (everest2)                                                                                   |
| 97  | NCT00794274 | 2   | Efficacy    | Academia      | 2008 | Lung and respiratory   | The efficacy and safety of CC-10004 in chronic cutaneous sarcoidosis                                                                                               |
| 98  | NCT02772679 | 1   | Efficacy    | Academia      | 2016 | Endocrinology          | T1DM immunotherapy using polyclonal tregs + IL-2 (TILT)                                                                                                            |
| 99  | NCT00540007 | 2   | Exploratory | Industry      | 2007 | Oncology               | Lenalidomide in relapsed or refractory classical hodgkin lymphoma                                                                                                  |
| 100 | NCT00931346 | 1/2 | Efficacy    | Academia      | 2009 | Infection              | A pilot study of pre-exposure prophylaxis (PrEP) to evaluate safety, acceptability, and adherence in at-risk populations in Uganda, Africa                         |
| 101 | NCT00820547 | 2   | Efficacy    | Industry      | 2009 | Oncology               | Efficacy and tolerance study of bevacizumab in her2-inflammatory breast cancer patients (beverly1)                                                                 |
| 102 | NCT00471588 | 1   | Exploratory | Industry      | 2006 | Central Nervous System | Characterize the modulatory effects of dopamine D2/D3 receptor agonist and antagonist drugs on compulsive behaviors                                                |
| 103 | NCT00073073 | 2   | Exploratory | Academia      | 2003 | Oncology               | Exemestane and celecoxib in postmenopausal women at high risk for breast cancer                                                                                    |
| 104 | NCT02598557 | 2   | Exploratory | Academia      | 2016 | Oncology               | Alternative dosing of exemestane before surgery in treating postmenopausal patients with stage 0-ii estrogen positive breast cancer                                |
| 105 | NCT01711398 | 1/2 | Efficacy    | Industry      | 2012 | Oncology               | Dose-finding adaptive phase I/IIa study to assess safety, tolerability, pharmacokinetics and preliminary efficacy of IPP-204106N on advanced solid tumors (IP N02) |

|     |             |   |             |          |      |          |                                                                                                                                                           |
|-----|-------------|---|-------------|----------|------|----------|-----------------------------------------------------------------------------------------------------------------------------------------------------------|
| 106 | NCT01245985 | 2 | Exploratory | Academia | 2010 | Oncology | TPF followed by cetuximab and imrt plus carbon ion boost for locally advanced head and neck tumors (TPF-C-HIT)                                            |
| 107 | NCT01714037 | 1 | Exploratory | Industry | 2012 | Oncology | A clinical study on the safety and efficacy of debio 0932 in combination with standard of care in patients with non-small cell lung cancer [NSCLC] (HALO) |
| 108 | NCT01240460 | 1 | Efficacy    | Industry | 2011 | Oncology | Exploratory study of XL765 (SAR245409) or XL147 (SAR245408) in subjects with recurrent glioblastoma who are candidates for surgical resection             |
| 109 | NCT00105950 | 2 | Efficacy    | Industry | 2005 | Oncology | Study of lapatinib in patients with relapsed or refractory inflammatory breast cancer                                                                     |
